# Supplementary material for: A class of carbon supported transition metal–nitrogen complex catalysts for dye-sensitized solar cells
Source: Royal Society of Chemistry journal article supplement (doi:10.1039/c2ta00554a), 2012-11-16
Supplement: c2ta00554a.pdf [file c2ta00554a.pdf]

## Supporting information

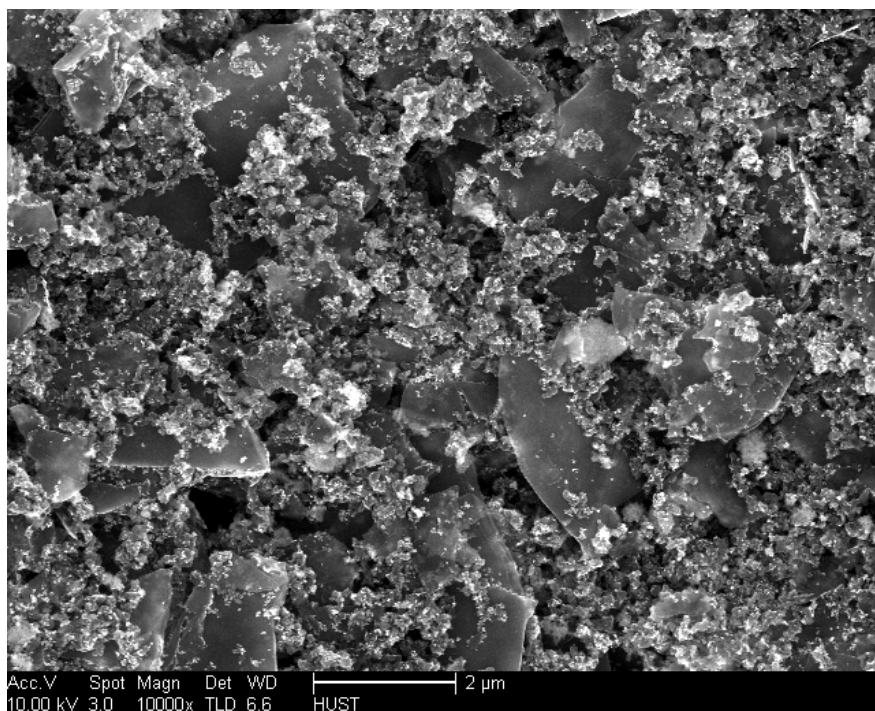

**Figure.S1** Low-magnification SEM image of the PPy modified carbon substrate.

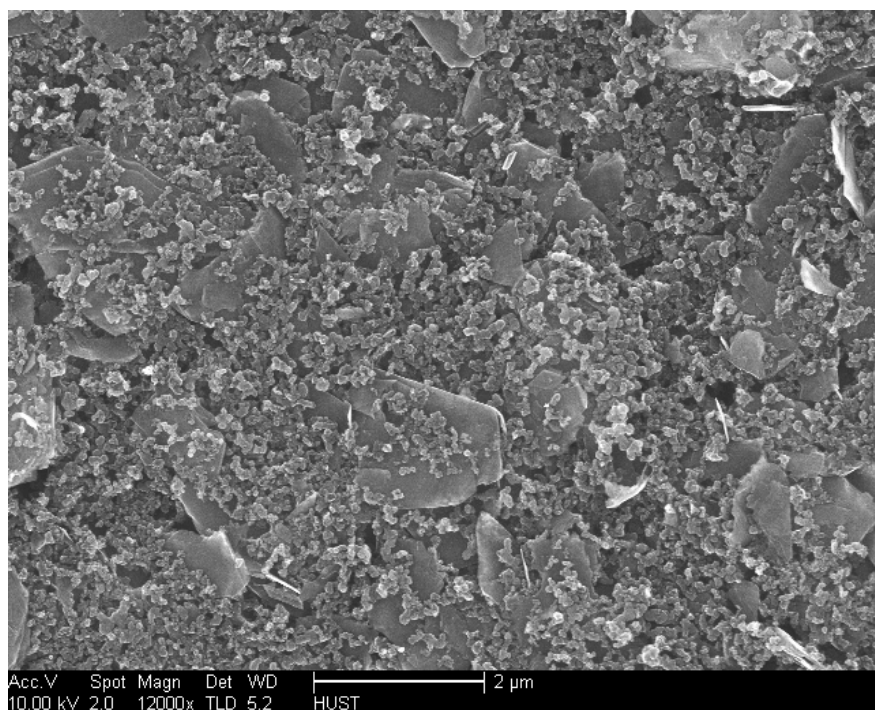

**Figure.S2** Low-magnification SEM image of the bare carbon substrate.

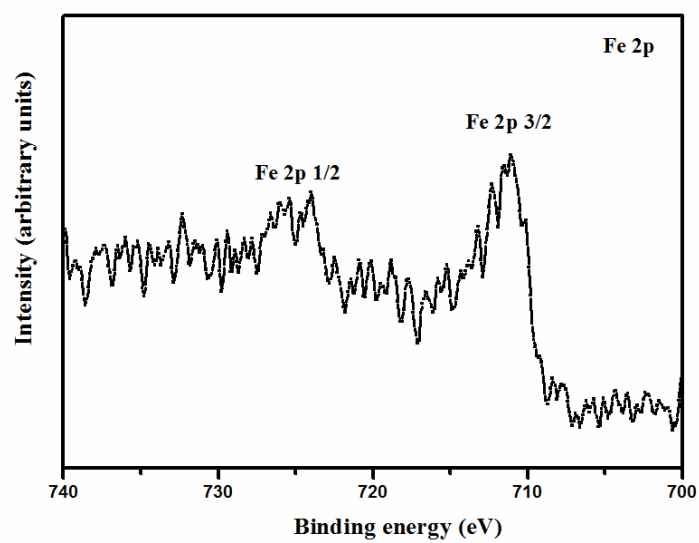

**Figure.S3** Fe2p core-level XPS spectra of Fe-PPy-C.

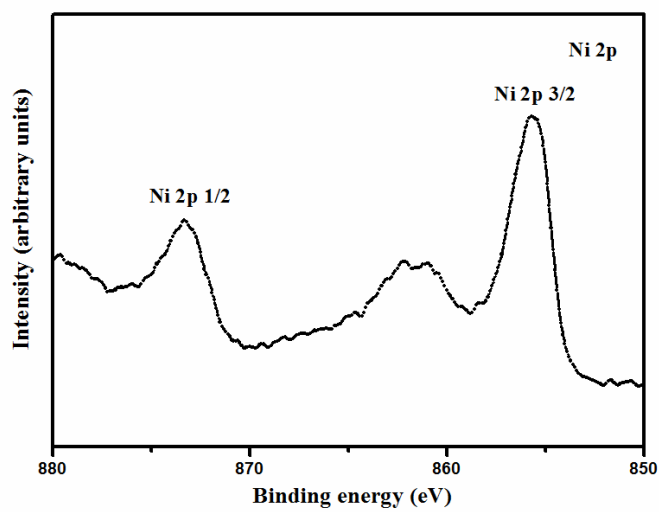

**Figure.S4** Ni2p core-level XPS spectra of Ni-PPy-C.

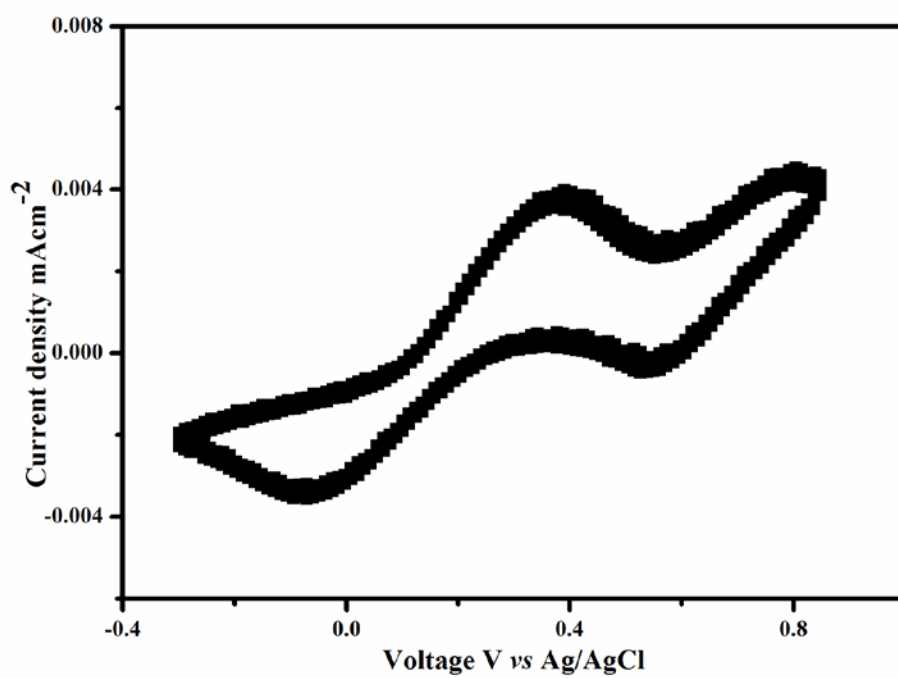

Figure.S4 A 50 consecutive cycle scan of cyclic voltammogram of the Co-PPy-carbon material in corrosive iodide electrolyte at a scan rate of 100 mV s<sup>-1</sup>.
